# Supplementary material for: Genomic Profiles Associated with Early Micrometastasis in Lung Cancer: Relevance of 4q Deletion
Source: Oxford University Press journal article supplement (doi:10.1158/1078-0432.ccr-08-2188), 2009-02-10
Supplement: 10780432ccr082188-sup-supplementary_table_s3.xls [file 10780432ccr082188-sup-supplementary_table_s3.xls]

## Sheet: Tabelle1
Supplementary table 3: Functional categories, which were enriched in the (A) 104 differentially expressed genes in the five significant chromosomal regions specific for the BM-status and in the (B) 100 most significant Affymetrix-clones compared to all genes on the array by gene ontology classification (GO)
A
Functional categories (GO-Term)	Nr. of involved Genes	percentage of genes involved/total genes [%]	p-value *
molecular function
epidermal growth factor receptor binding	3	2.8	<0.001
mRNA binding	3	2.8	0.009
transferase activity	17	16.0	0.028
catalytic activity	38	35.8	0.037
protein serine/threonine phosphatase activity	3	2.8	0.049
biological process
biopolymer metabolism	27	25.5	0.005
chromosome organization and biogenesis	7	6.6	0.007
cell organization and biogenesis	16	15.1	0.025
chromatin modification	4	3.8	0.038
protein amino acid dephosphorylation	4	3.8	0.045
positive regulation of cell proliferation	4	3.8	0.049
B
Functional categories (GO-Term)	Nr. of involved Genes	percentage of genes involved/total genes [%]	p-value *
molecular function
transcription regulator activity	16	16.7	<0.001
transcription factor activity	13	13.5	<0.001
transcriptional activator activity	6	6.2	0.004
DNA binding	17	17.7	0.022
biological process
nucleobase, nucleoside, nucleotide and nucleic acid metabolism	29	30.2	<0.001
regulation of transcription	22	22.9	<0.001
regulation of nucleobase, nucleoside, nucleotide and nucleic acid metabolism	22	22.9	<0.001
regulation of metabolism	23	24.0	<0.001
transcription	22	22.9	<0.001
regulation of cellular metabolism	22	22.9	<0.001
regulation of transcription, DNA-dependent	20	20.8	<0.001
transcription, DNA-dependent	20	20.8	0.001
regulation of cellular process	27	28.1	0.001
regulation of cellular physiological process	26	27.1	0.002
regulation of physiological process	26	27.1	0.002
regulation of biological process	27	28.1	0.003
primary metabolism	40	41.7	0.025
cellular metabolism	40	41.7	0.041
metabolism	42	43.8	0.045
* The threshold of EASE Score (maximum probability), a modified Fisher Exact p-value
